# Supplementary material for: Prediction of superconductivity in metallic boron–carbon compounds from 0 to 100 GPa by high-throughput screening
Source: Royal Society of Chemistry journal article supplement (doi:10.1039/d3cp03844k), 2023-01-01
Supplement: d3cp03844k1.pdf [file d3cp03844k1.pdf]

## Supplemental Materials

### Prediction of superconductivity in metallic boron-carbon compounds from 0 to 100 GPa by high-throughput screening

Feng Zheng<sup>1,2</sup>, Yang Sun<sup>2\*</sup>, Renhai Wang<sup>3</sup>, Yimei Fang<sup>2</sup>, Feng Zhang<sup>4,5</sup>, Shunqing Wu<sup>2\*</sup>,  
Qiubao Lin<sup>1\*</sup>, Cai-Zhuang Wang<sup>4,5</sup>, Vladimir Antropov<sup>4,5</sup>, Kai-Ming Ho<sup>4</sup>

<sup>1</sup>*School of Science, Jimei University, Xiamen 361021, China*

<sup>2</sup>*Department of Physics, OSED, Key Laboratory of Low Dimensional Condensed Matter Physics (Department of Education of Fujian Province), Jiujiang Research Institute, Xiamen University, Xiamen 361005, China.*

<sup>3</sup>*School of Physics and Optoelectronic Engineering, Guangdong University of Technology, Guangzhou 510006, China*

<sup>4</sup>*Department of Physics, Iowa State University, Ames, Iowa 50011, United States*

<sup>5</sup>*Ames Laboratory, U.S. Department of Energy, Ames, Iowa 50011, USA*

#### SUPPLEMENTARY MATERIALS

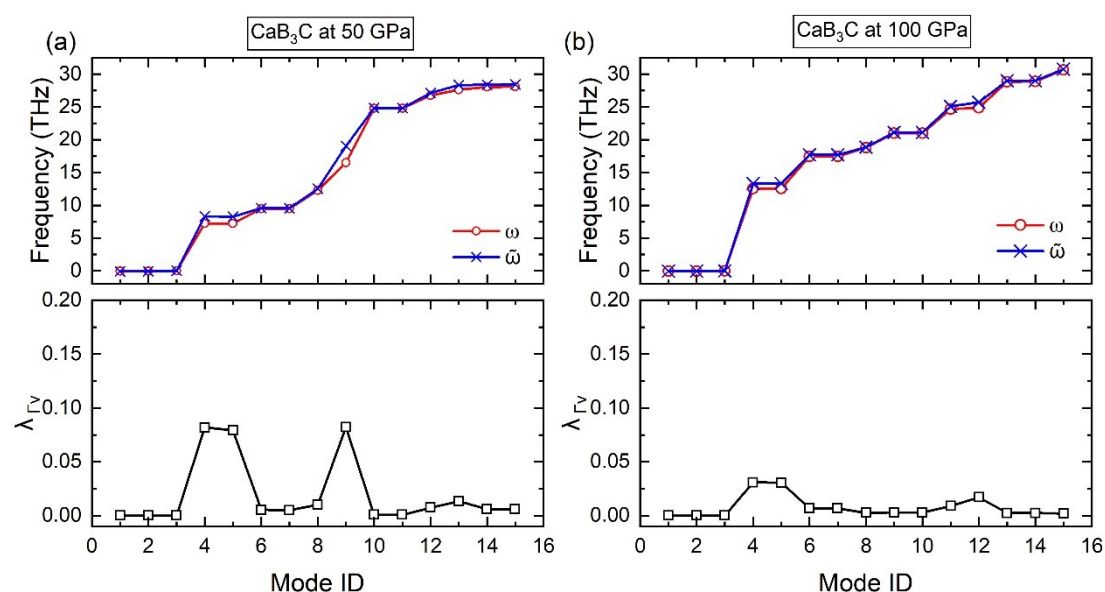

Fig. S1. The screened and unscreened phonon frequency (top panel) and zone-center EPC strength (bottom panel) in CaB<sub>3</sub>C at (a) 50 and (b) 100 GPa.

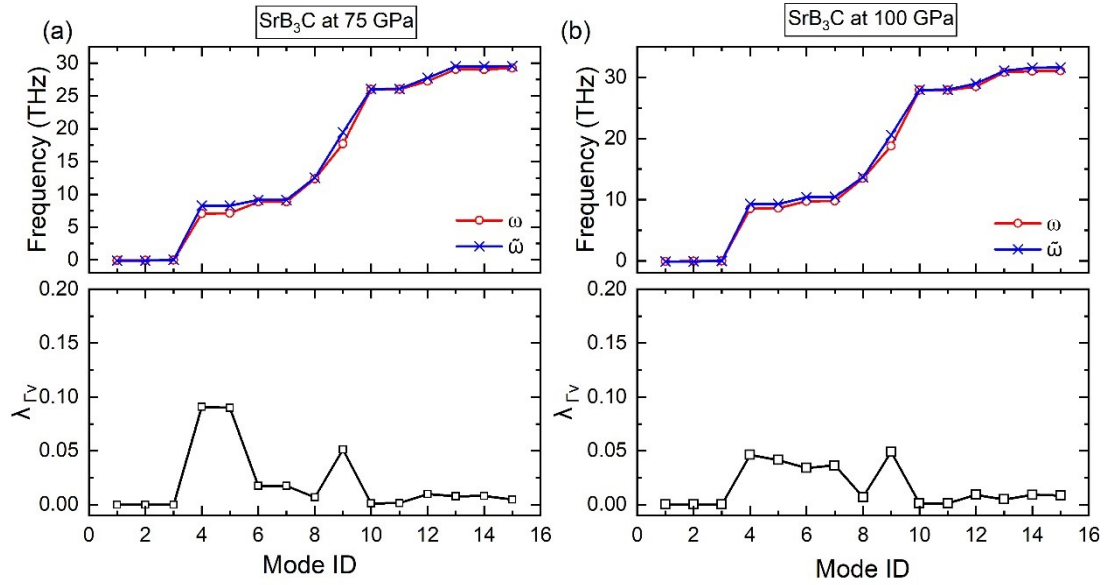

Fig. S2. The screened and unscreened phonon frequency (top panel) and zone-center EPC strength (bottom panel) in SrB<sub>3</sub>C at (a) 50 and (b) 100 GPa.

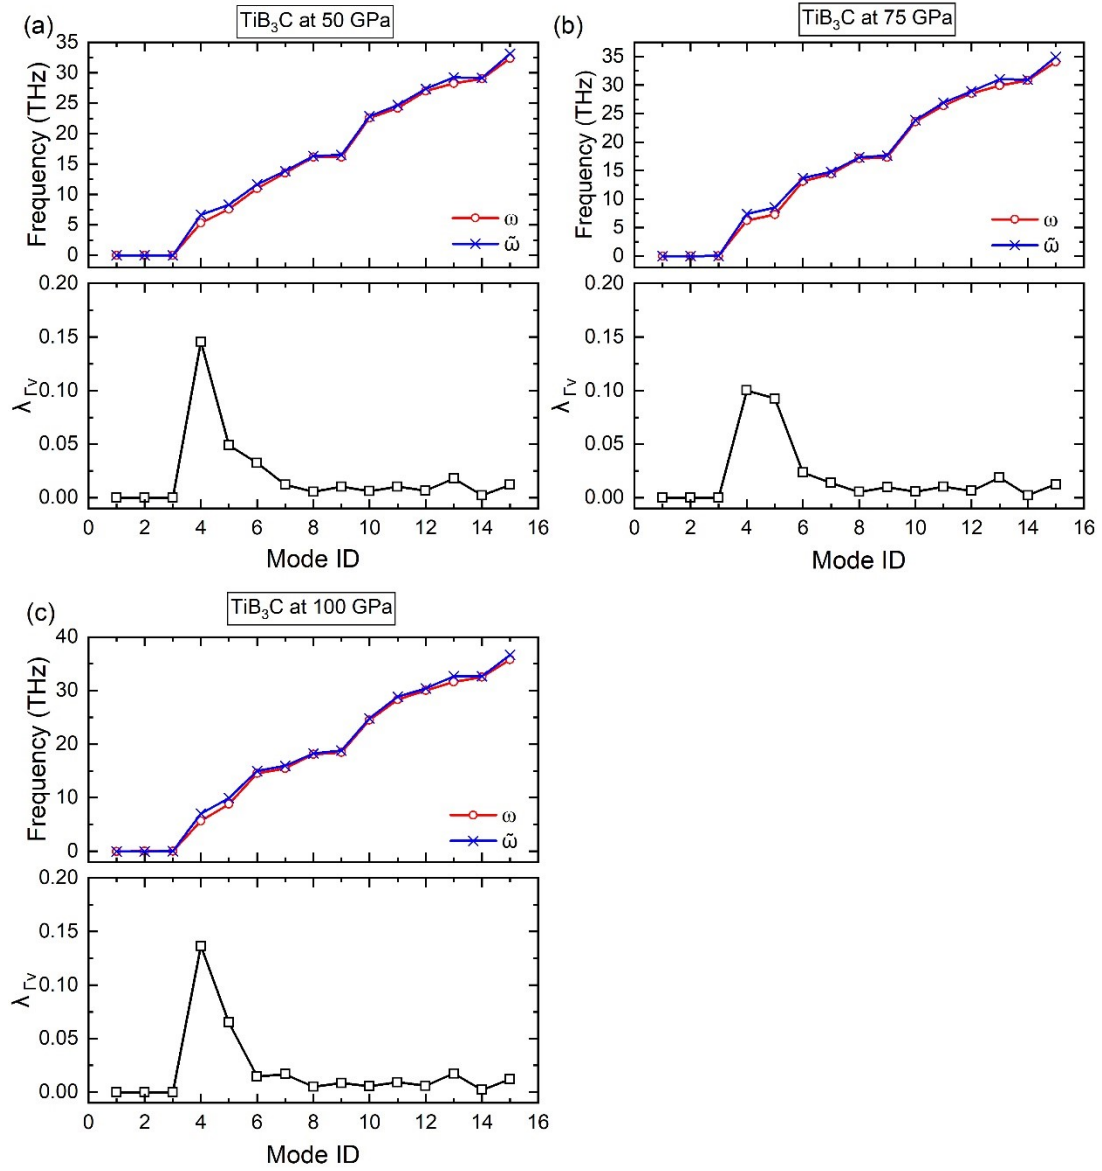

Fig. S3. The screened and unscreened phonon frequency (top panel) and zone-center EPC strength (bottom panel) in  $\text{TiB}_3\text{C}$  at (a) 50, (b) 75 and (c) 100 GPa.

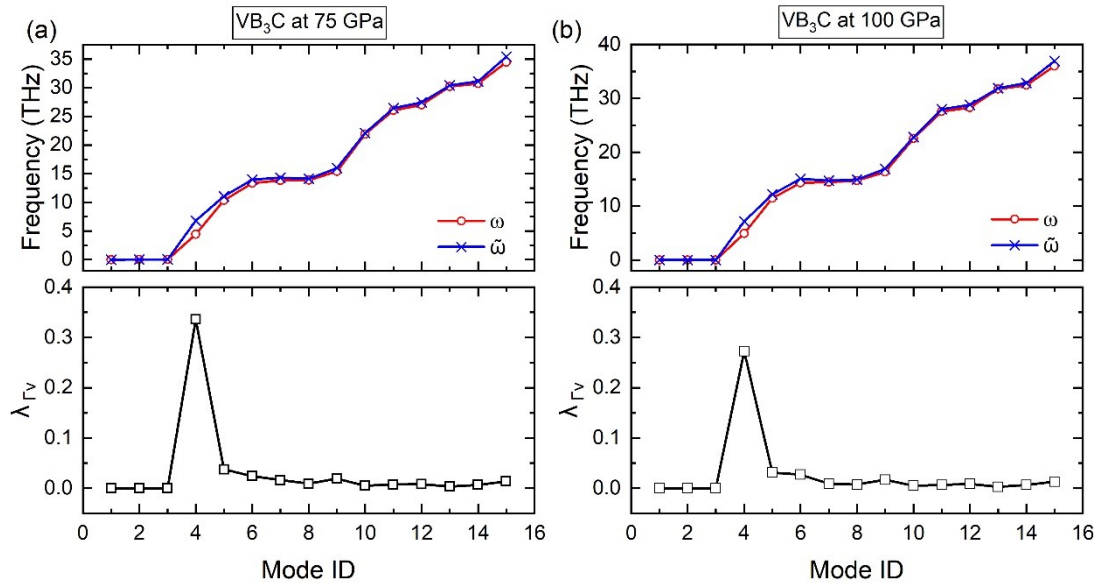

Fig. S4. The screened and unscreened phonon frequency (top panel) and zone-center EPC strength (bottom panel) in  $\text{VB}_3\text{C}$  at (a) 75 and (b) 100 GPa.

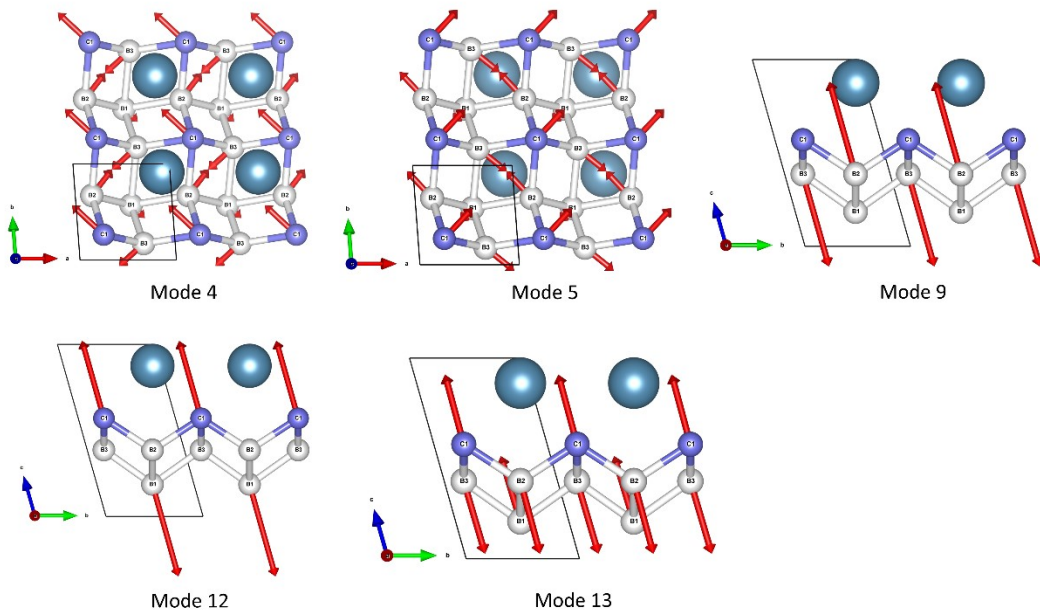

Fig. S5. The vibrational patterns for modes 4, 5, 9, 12, and 13 at the  $\Gamma$  point of  $\text{CaB}_3\text{C}$  at 50 GPa.

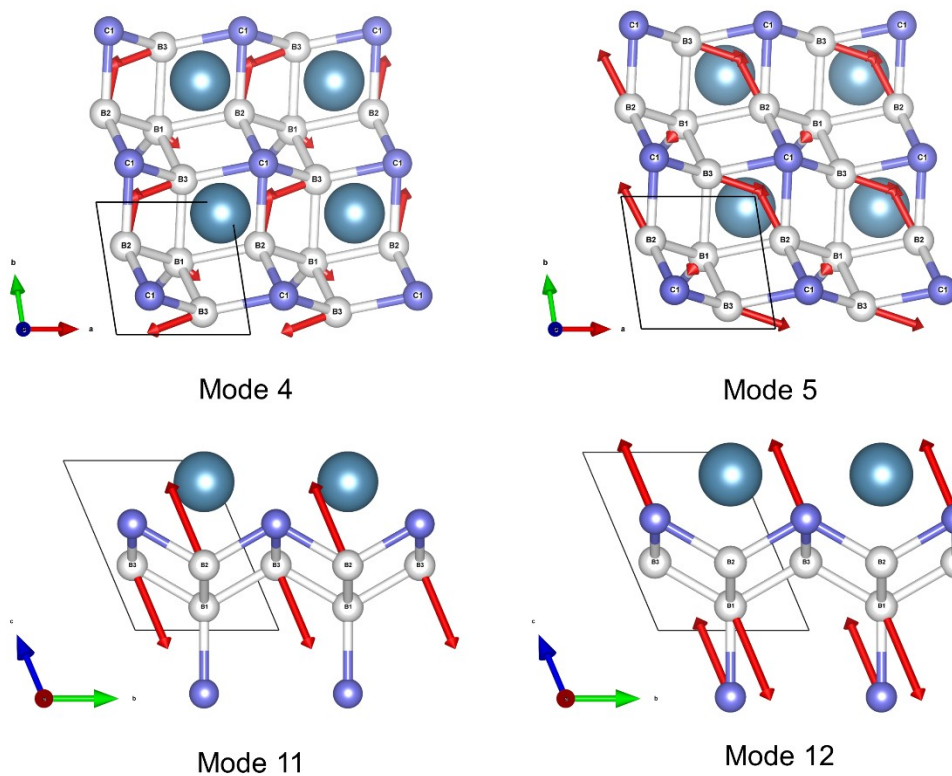

Fig. S6. The vibrational patterns for modes 4, 5, 11, and 12 at the  $\Gamma$  point of  $\text{CaB}_3\text{C}$  at 100 GPa.

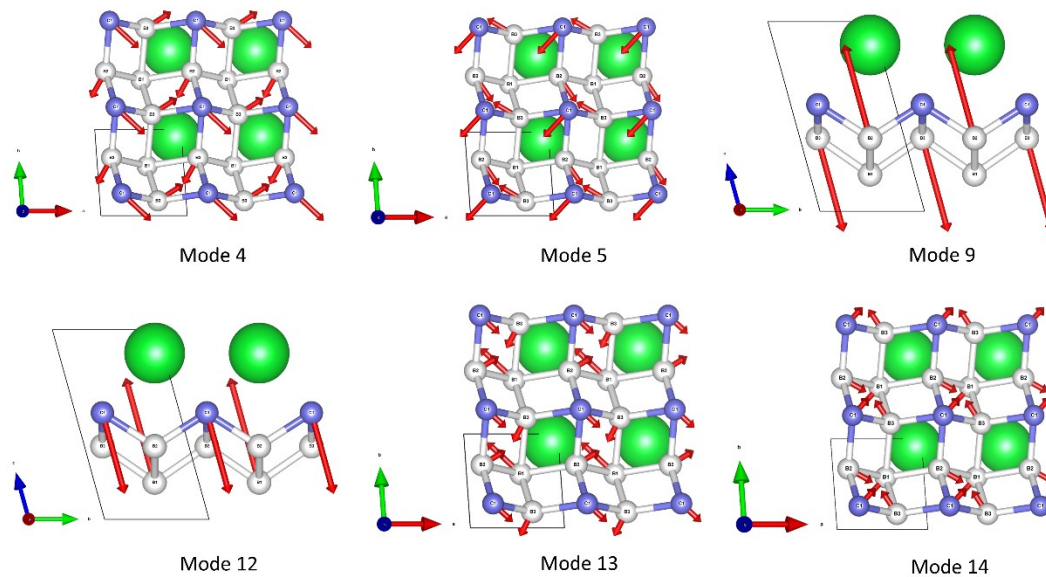

Fig. S7. The vibrational patterns for modes 4, 5, 9, 12, 13, and 14 at the  $\Gamma$  point of  $\text{SrB}_3\text{C}$  at 75 GPa

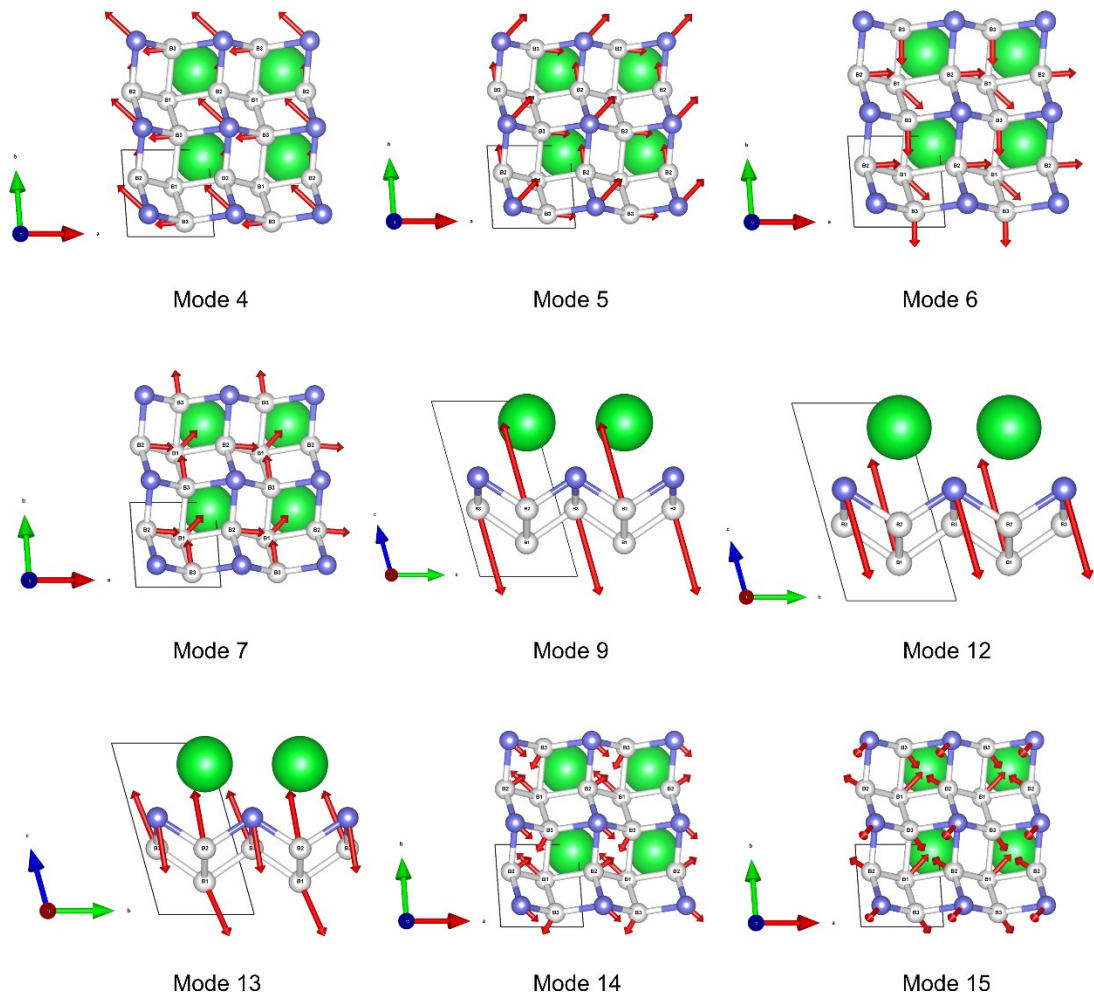

Fig. S8. The vibrational patterns for modes 4, 5, 6, 7, 9, 12, 13, 14, and 15 at the  $\Gamma$  point of SrB<sub>3</sub>C at 100 GPa.



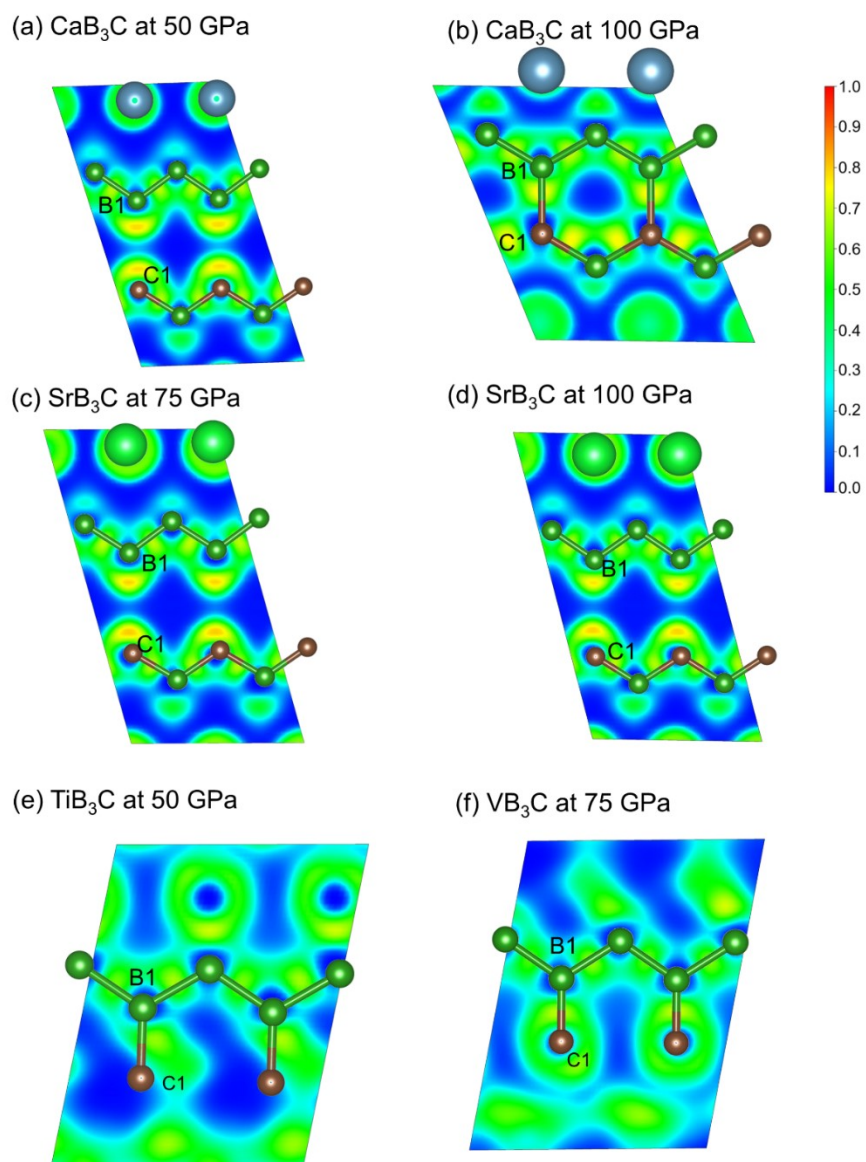

Fig. S9. The electron localization function (ELF) maps of (a)  $\text{CaB}_3\text{C}$  at 50 GPa, (b)  $\text{CaB}_3\text{C}$  at 100 GPa, (c)  $\text{SrB}_3\text{C}$  at 75 GPa, (d)  $\text{SrB}_3\text{C}$  at 100 GPa, (e)  $\text{TiB}_3\text{C}$  at 50 GPa, and (f)  $\text{VB}_3\text{C}$  at 75 GPa.

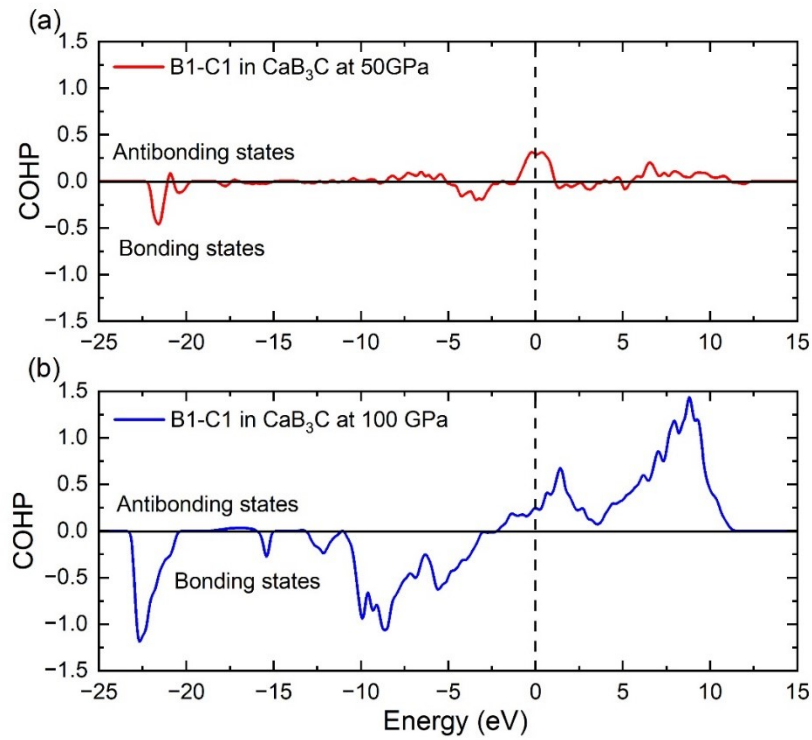

Fig. S10. The COHP for pair B1-C1 in  $\text{CaB}_3\text{C}$  at (a) 50 GPa and (b) 100 GPa.

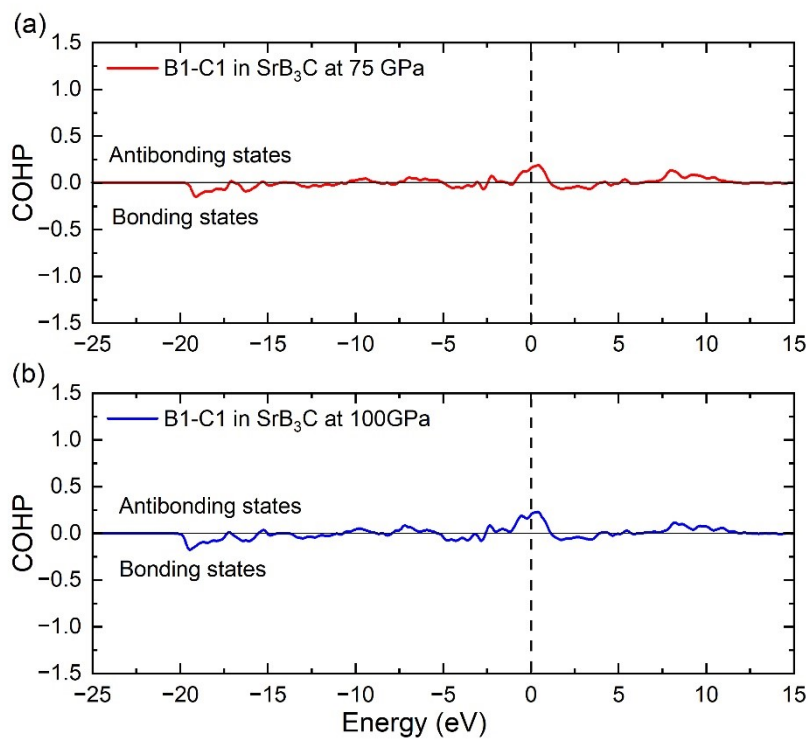

Fig. S11. The COHP for pair B1-C1 in  $\text{SrB}_3\text{C}$  at (a) 75 GPa and (b) 100 GPa.



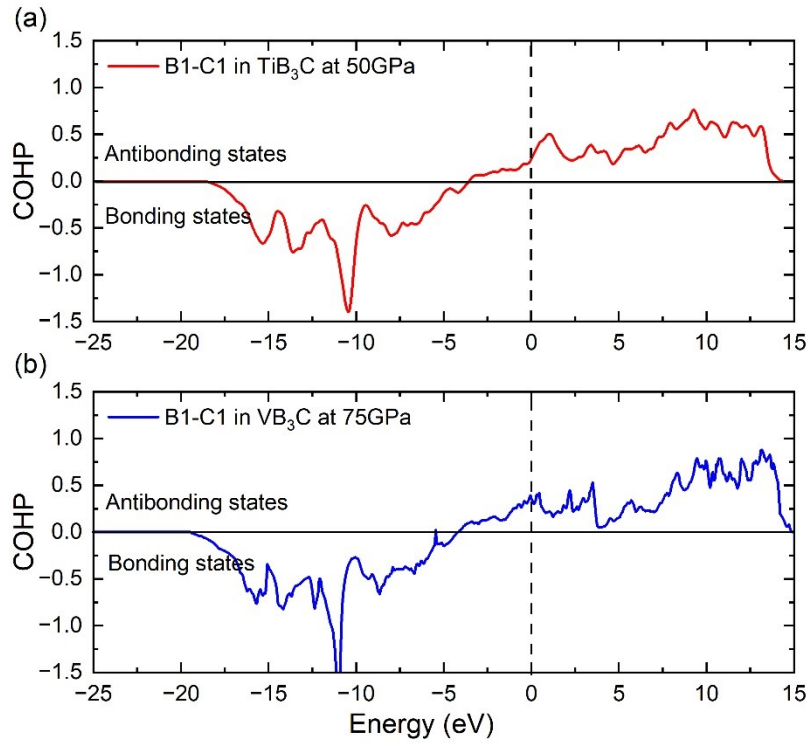

Fig. S12. The COHP for pair B1-C1 in (a) TiB<sub>3</sub>C at 50 GPa and VB<sub>3</sub>C at 100 GPa.

(a)  $\text{CaB}_3\text{C}$

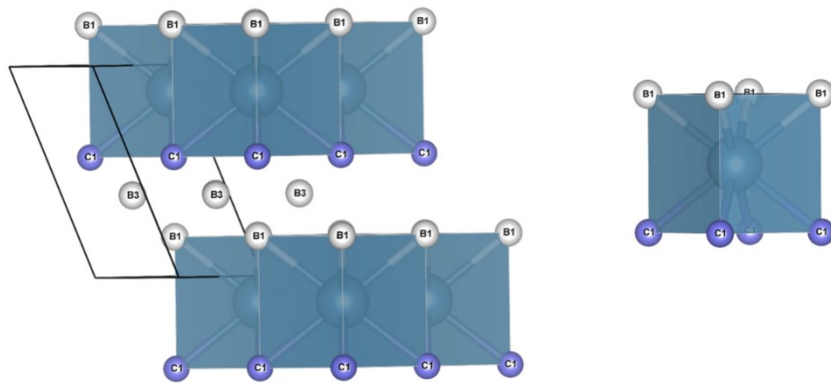

(b)  $\text{SrB}_3\text{C}$

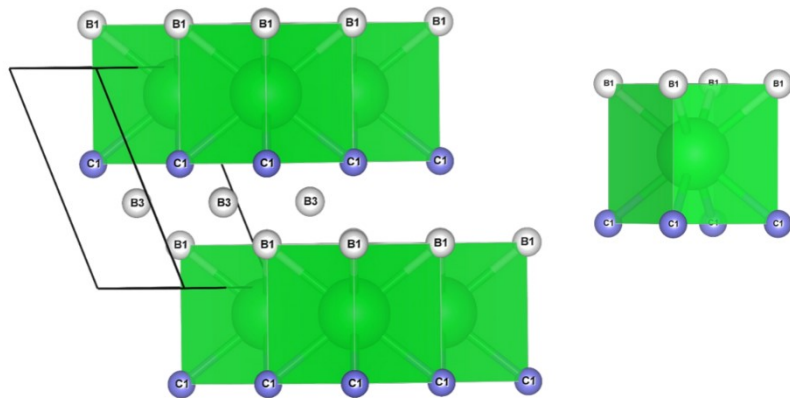

Fig. S13. Crystal structure and coordination polyhedron of (a)  $\text{CaB}_3\text{C}$  and (b)  $\text{SrB}_3\text{C}$ .

(a)  $\text{TiB}_3\text{C}$  at 75 GPa

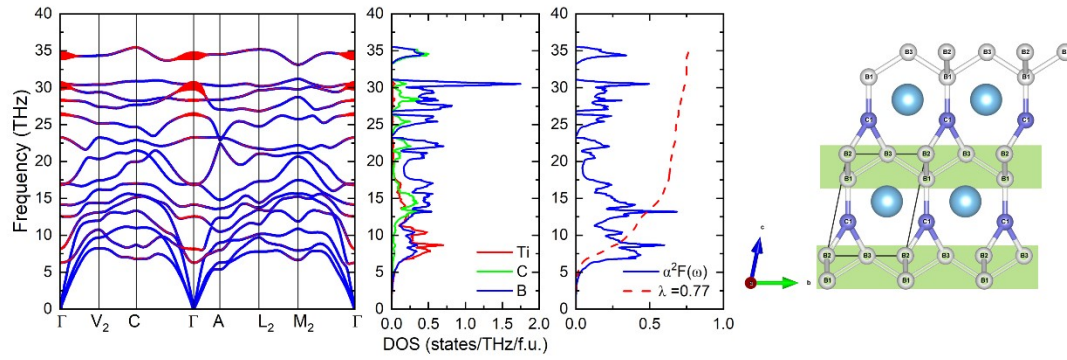

(b)  $\text{TiB}_3\text{C}$  at 100 GPa

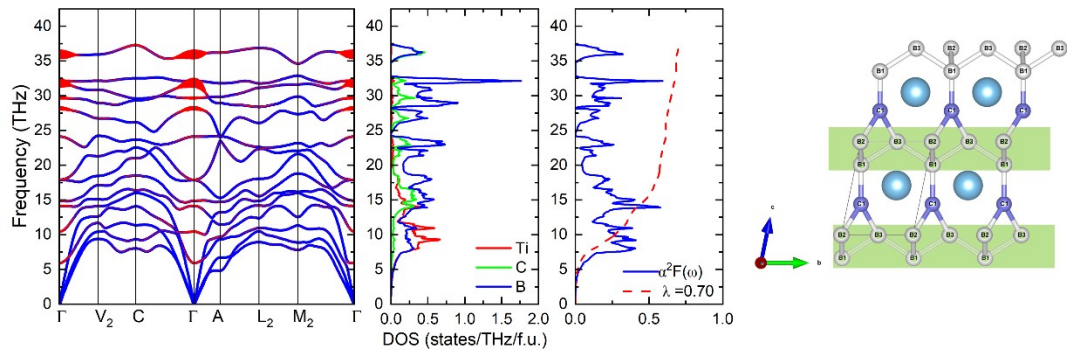

Fig. S14. The  $\gamma_{qv}$ -weighted phonon spectrum, projected phonon density of states (PHDOS), Eliashberg spectral function  $\alpha^2F(\omega)$  and crystal structure of  $\text{TiB}_3\text{C}$  at (a) 75 and (b) 100 GPa.

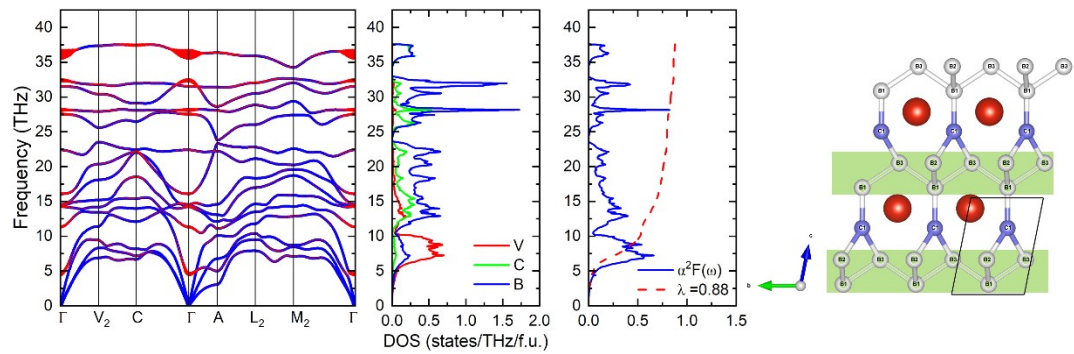

Fig. S15. The  $\gamma_{qv}$ -weighted phonon spectrum, projected phonon density of states (PHDOS), Eliashberg spectral function  $\alpha^2F(\omega)$  and crystal structure of  $\text{VB}_3\text{C}$  at 100 GPa.

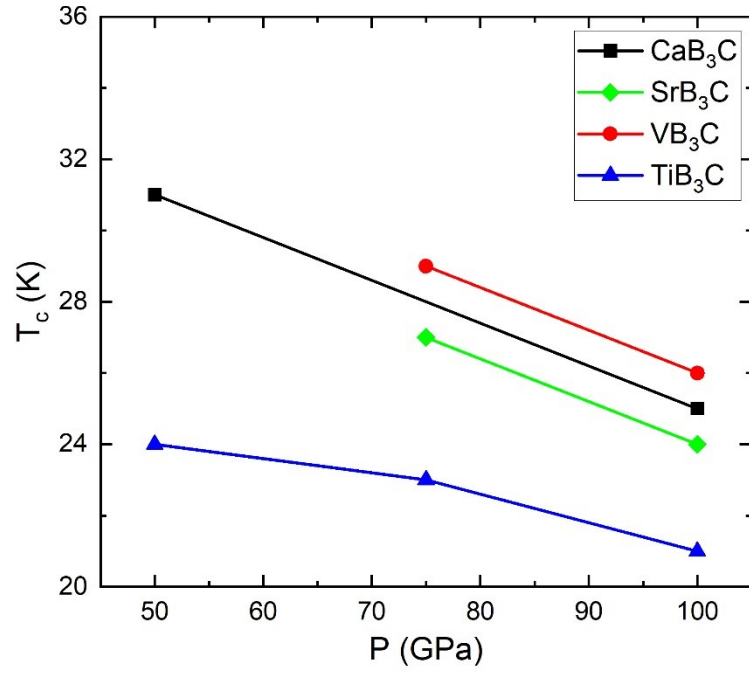

Fig.S16. The pressure-dependence of the  $T_c$  of CaB<sub>3</sub>C, SrB<sub>3</sub>C, TiB<sub>3</sub>C, and VB<sub>3</sub>C compounds.

Table S1. The covalent radii (Å) of B and C and ionic radii (Å) of Ca, Sr, Ti, and V.

|                            | B    | C    | Ca   | Sr   | Ti   | V    |
|----------------------------|------|------|------|------|------|------|
| Covalent radii             | 0.84 | 0.76 |      |      |      |      |
| Ionic radii (8-coordinate) |      |      | 1.26 | 1.40 | 0.88 | 0.86 |
